# Supplementary material for: Germanium Dioxide Nanoparticles Mitigate Biochemical and Molecular Changes Characterizing Alzheimer’s Disease in Rats
Source: MDPI journal article supplement (doi:10.3390/pharmaceutics15051386), 2023-04-30
Supplement: s1 [file s1]

# Supplementary Materials: Germanium Dioxide Nanoparticles mitigate Biochemical and Molecular Changes Characterizing Alzheimer's Disease in Rats

Sara A. Abdel Gaber, Amal H. Hamza, Mohamed A. Tantawy and Eman A. Toraih, Hanaa H. Ahmed

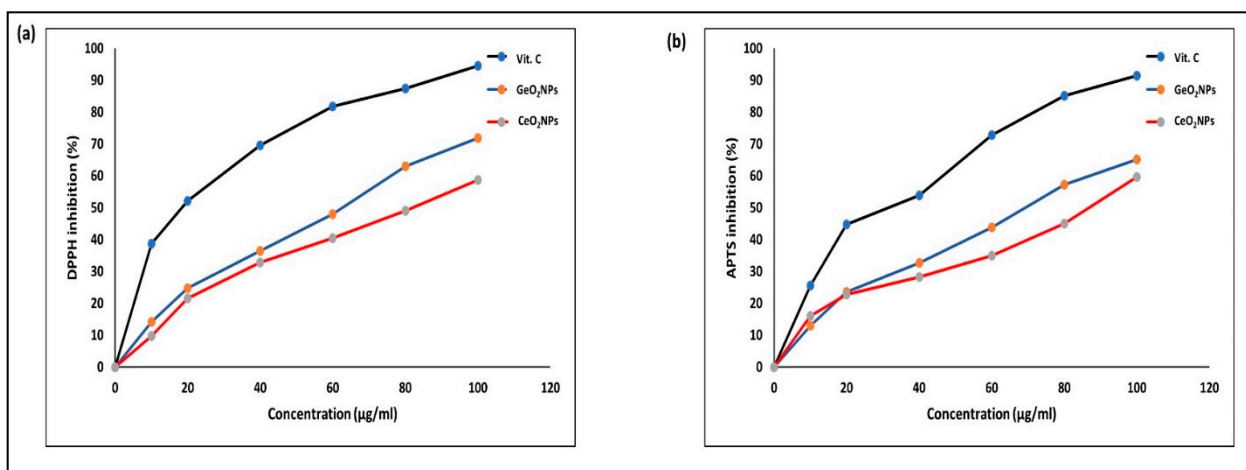

**Figure S1.** (a) antioxidant activity of GeO<sub>2</sub>NPs and CeO<sub>2</sub>NPs tested by DPPH assay, (b) antioxidant activity of GeO<sub>2</sub>NPs and CeO<sub>2</sub>NPs tested by APTS assay. Vitamin C (Vit. C) was used as a standard.
